# Supplementary material for: Directed evolution of broadly crossreactive chemokine-blocking antibodies efficacious in arthritis
Source: PubMed Central journal article supplement (PMC5899157; doi:10.1038/s41467-018-03687-x), 2018-04-13
Supplement: 41467_2018_3687_MOESM3_ESM.pdf [file 41467_2018_3687_MOESM3_ESM.pdf]

## Description of Additional Supplementary Files

File Name: Supplementary Data 1

Description: Protein accession numbers, oligonucleotide primers, DNA and amino-acid sequences of <sup>N</sup>Fc-CXCL<sup>C</sup> fusion proteins.

File Name: Supplementary Data 2

Description: Protein accession numbers, oligonucleotide primers, DNA and amino-acid sequences of <sup>N</sup>CXCL-SA<sup>C</sup> fusion proteins.

File Name: Supplementary Data 3

Description: Protein accession numbers, oligonucleotide primers, DNA and amino-acid sequences of serum albumin-antibody fusion proteins (SA-scFv).

File Name: Supplementary Data 4

Description: Oligonucleotide primers used for combinatorial site-directed mutagenesis.

File Name: Supplementary Data 5

Description: Protein accession numbers, oligonucleotide primers, DNA and amino-acid sequences of <sup>N</sup>CXCL-Aga2<sup>C</sup> fusion proteins.

File Name: Supplementary Data 6

Description: Epitope mapping by Alanine scanning of hCXCL1.
