# Supplementary material for: Directed evolution of broadly crossreactive chemokine-blocking antibodies efficacious in arthritis
Source: PubMed Central journal article supplement (PMC5899157; doi:10.1038/s41467-018-03687-x), 2018-04-13
Supplement: 41467_2018_3687_MOESM7_ESM.pdf [file 41467_2018_3687_MOESM7_ESM.pdf]

### Supplementary Data 4 - Oligonucleotide primers used for combinatorial site-directed mutagenesis

| Product      | Template | Primer forward sequence (5' to 3')                                                                                                   | Primer reverse sequence (5' to 3')                                                                                                  |
|--------------|----------|--------------------------------------------------------------------------------------------------------------------------------------|-------------------------------------------------------------------------------------------------------------------------------------|
| <b>CK131</b> | CK63     | CAGTTACTCTCCGTATTATACTTGGTTCTCTGCTGGTATG                                                                                             | CATACCAGCAGAGAACCAAGTATAATACGGAGAGTAACTG                                                                                            |
| <b>CK132</b> | CK63     | CAGTTACTCTCCGTATTATACTTGGTTCTCTGCTGGTATG<br>GATTTACGGTGCATCCTACCCGTACTCCGGAGTCCCTTCCCG                                               | CATACCAGCAGAGAACCAAGTATAATACGGAGAGTAACTG<br>CGGGAAGGGACTCCGGAGTACGGGTAGGATGCACCGTAAATC                                              |
| <b>CK133</b> | CK63     | GATTTACGGTGCATCCTACCCGTACTCCGGAGTCCCTTCCCG                                                                                           | CGGGAAGGGACTCCGGAGTACGGGTAGGATGCACCGTAAATC                                                                                          |
| <b>CK134</b> | CK66     | CAGTTACTCTCCGTATTATTCTTGGTTCTCTGCTGGTATG                                                                                             | CATACCAGCAGAGAACCAAGAATAATACGGAGAGTAACTG                                                                                            |
| <b>CK135</b> | CK66     | GATTTACGGTGCATCCTACCTGTACTCTGGAGTCCCTTCCCG<br>CAGTTACTCTCCGTATTATTCTTGGTTCTCTGCTGGTATG                                               | CGGGAAGGGACTCCAGAGTACAGGTAGGATGCACCGTAAATC<br>CATACCAGCAGAGAACCAAGAATAATACGGAGAGTAACTG                                              |
| <b>CK136</b> | CK66     | GATTTACGGTGCATCCTACCTGTACTCTGGAGTCCCTTCCCG                                                                                           | CGGGAAGGGACTCCAGAGTACAGGTAGGATGCACCGTAAATC                                                                                          |
| <b>CK137</b> | CK72     | GATTTACGGTGCATCCTACCCGTACTCTGGAGTCCCTTCCCG                                                                                           | CGGGAAGGGACTCCAGAGTACGGGTAGGATGCACCGTAAATC                                                                                          |
| <b>CK138</b> | CK72     | GGTTACAGTTACTCTCCGTATTATTCTTGGTTCTCTGCTGG<br>CTTGGTTCTCTGCTGGTATGAACTACTGGGGTCAAGGAGCC                                               | CCAGCAGAGAACCAAGAATAATACGGAGAGTAACTGTAACC<br>GGCTCCTTGACCCAGTAGTTCATACCAGCAGAGAACCAAG                                               |
| <b>CK139</b> | CK72     | CTTGGTTCTCTGCTGGTATGAACTACTGGGGTCAAGGAGCC<br>CAGTTACTCTCCGTATTATACTTGGTTCTCTGCTGGTATG<br>GGTTACAGTTACTCTCCGTATTATTCTTGGTTCTCTGCTGG   | GGCTCCTTGACCCAGTAGTTCATACCAGCAGAGAACCAAG<br>CATACCAGCAGAGAACCAAGTATAATACGGAGAGTAACTG<br>CCAGCAGAGAACCAAGAATAATACGGAGAGTAACTGTAACC   |
| <b>CK140</b> | CK72     | GATTTACGGTGCATCCTACCCGTACTCTGGAGTCCCTTCCCG<br>GGTTACAGTTACTCTCCGTATTATTCTTGGTTCTCTGCTGG<br>CTTGGTTCTCTGCTGGTATGAACTACTGGGGTCAAGGAGCC | CGGGAAGGGACTCCAGAGTACGGGTAGGATGCACCGTAAATC<br>CCAGCAGAGAACCAAGAATAATACGGAGAGTAACTGTAACC<br>GGCTCCTTGACCCAGTAGTTCATACCAGCAGAGAACCAAG |
| <b>CK141</b> | CK72     | GATTTACGGTGCATCCTACCCGTACTCTGGAGTCCCTTCCCG                                                                                           | CGGGAAGGGACTCCAGAGTACGGGTAGGATGCACCGTAAATC                                                                                          |

|              |       |                                                                                                                                    |                                                                                                                                      |
|--------------|-------|------------------------------------------------------------------------------------------------------------------------------------|--------------------------------------------------------------------------------------------------------------------------------------|
|              |       | CTTGGTTCTCTGCTGGTATGAACTACTGGGGTCAAGGAGCC<br>CAGTTACTCTCCGTATTATACTTGGTTCTCTGCTGGTATG<br>GGTTACAGTTACTCTCCGTATTATTCTTGGTTCTCTGCTGG | GGTCCTTGACCCAGTAGTTCATACCAGCAGAGAACCAAG<br>CATAACCAGCAGAGAACCAAGTATAATACGGAGAGTAACTG<br>CCAGCAGAGAACCAAGAATAATACGGAGAGTAACTGTAACC    |
| <b>CK142</b> | CK72  | GGTTACAGTTACTCTCCGTATTATTCTTGGTTCTCTGCTGG                                                                                          | CCAGCAGAGAACCAAGAATAATACGGAGAGTAACTGTAACC                                                                                            |
| <b>CK143</b> | CK72  | CAGTTACTCTCCGTATTATACTTGGTTCTCTGCTGGTATG<br>GGTTACAGTTACTCTCCGTATTATTCTTGGTTCTCTGCTGG                                              | CATAACCAGCAGAGAACCAAGTATAATACGGAGAGTAACTG<br>CCAGCAGAGAACCAAGAATAATACGGAGAGTAACTGTAACC                                               |
| <b>CK144</b> | CK72  | GATTTACGGTGCATCCTACCCGACTCTGGAGTCCCTTCCCG<br>GGTTACAGTTACTCTCCGTATTATTCTTGGTTCTCTGCTGG                                             | CGGGAAGGGACTCCAGAGTACGGGTAGGATGCACCGTAAATC<br>CCAGCAGAGAACCAAGAATAATACGGAGAGTAACTGTAACC                                              |
| <b>CK145</b> | CK72  | GATTTACGGTGCATCCTACCCGACTCTGGAGTCCCTTCCCG<br>CAGTTACTCTCCGTATTATACTTGGTTCTCTGCTGGTATG<br>GGTTACAGTTACTCTCCGTATTATTCTTGGTTCTCTGCTGG | CGGGAAGGGACTCCAGAGTACGGGTAGGATGCACCGTAAATC<br>CATAACCAGCAGAGAACCAAGTATAATACGGAGAGTAACTG<br>CCAGCAGAGAACCAAGAATAATACGGAGAGTAACTGTAACC |
| <b>CK146</b> | CK111 | GGTGCGTCAGGCCCCGGGTGAGGAGCTGGAATGGGTTGC                                                                                            | GCAACCCATTCCAGCTCCTCACCCGGGGCCTGACGCACC                                                                                              |
| <b>CK147</b> | CK111 | GCATCTATTGGTTCTTACCCTGGCTACACTGACTATGC                                                                                             | GCATAGTCAGTGTAGCCAGGGTAAGAACCAATAGATGC                                                                                               |
| <b>CK148</b> | CK111 | GGTGCGTCAGGCCCCGGGTGAGGAGCTGGAATGGGTTGC<br>GCATCTATTGGTTCTTACCCTGGCTACACTGACTATGC                                                  | GCAACCCATTCCAGCTCCTCACCCGGGGCCTGACGCACC<br>GCATAGTCAGTGTAGCCAGGGTAAGAACCAATAGATGC                                                    |
| <b>CK149</b> | CK111 | GCAGCTTCTGGCTCCAACCCCTACTACTACGGTGGTACG                                                                                            | CGTACCACCGTAGTAGTAGGGTTGGAGCCAGAAGCTGC                                                                                               |
| <b>CK150</b> | CK108 | CACGTTCCGACAGGGTACCGAGGTGGAGATCAAAGGTAC                                                                                            | GTACCTTTGATCTCCACCTCGGTACCCTGTCCGAACGTG                                                                                              |
| <b>CK151</b> | CK111 | GGTGCGTCAGGCCCCGGGTGAGGAGCTGGAATGGGTTGC<br>GCAGCTTCTGGCTCCAACCCCTACTACTACGGTGGTACG                                                 | GCAACCCATTCCAGCTCCTCACCCGGGGCCTGACGCACC<br>CGTACCACCGTAGTAGTAGGGTTGGAGCCAGAAGCTGC                                                    |
| <b>CK152</b> | CK108 | CACGTTCCGACAGGGTACCGAGGTGGAGATCAAAGGTAC<br>GGTGCGTCAGGCCCCGGGTGAGGAGCTGGAATGGGTCGC                                                 | GTACCTTTGATCTCCACCTCGGTACCCTGTCCGAACGTG<br>GCGACCCATTCCAGCTCCTCACCCGGGGCCTGACGCACC                                                   |
| <b>CK153</b> | CK119 | CACGTTCCGACAGGGTACCGAGGTGGAGATCAAAGGTAC                                                                                            | GTACCTTTGATCTCCACCTCGGTACCCTGTCCGAACGTG                                                                                              |

---

|              |       |                                                                                                                               |                                                                                                                             |
|--------------|-------|-------------------------------------------------------------------------------------------------------------------------------|-----------------------------------------------------------------------------------------------------------------------------|
| <b>CK154</b> | CK119 | GCATCTATTGGTTCTTACCCTGGCTACACTGACTATGC                                                                                        | GCATAGTCAGTGTAGCCAGGGTAAGAACCAATAGATGC                                                                                      |
| <b>CK155</b> | CK119 | GCATCTATTGGTTCTTACCCTGGCTACACTGACTATGC<br>CACGTTCCGGACAGGGTACCGAGGTGGAGATCAAAGGTAC                                            | GCATAGTCAGTGTAGCCAGGGTAAGAACCAATAGATGC<br>GTACCTTTGATCTCCACCTCGGTACCCTGTCCGAACGTG                                           |
| <b>CK156</b> | CK119 | GCATCTATTGGTTCTTACCCTGGCTACACTGACTATGC<br>GCAGCTTCTGGCTCCAACCCCTACTACTACGGTGGTACG                                             | GCATAGTCAGTGTAGCCAGGGTAAGAACCAATAGATGC<br>CGTACCACCGTAGTAGTAGGGTTGGAGCCAGAAGCTGC                                            |
| <b>CK157</b> | CK119 | GCATCTATTGGTTCTTACCCTGGCTACACTGACTATGC<br>GCAGCTTCTGGCTCCAACCCCTACTACTACGGTGGTACG<br>CACGTTCCGGACAGGGTACCGAGGTGGAGATCAAAGGTAC | GCATAGTCAGTGTAGCCAGGGTAAGAACCAATAGATGC<br>CGTACCACCGTAGTAGTAGGGTTGGAGCCAGAAGCTGC<br>GTACCTTTGATCTCCACCTCGGTACCCTGTCCGAACGTG |
| <b>CK158</b> | CK108 | GGTGCGTCAGGCCCCGGGTGAGGAGCTGGAATGGGTTGC                                                                                       | GCAACCCATTCCAGCTCCTCACCCGGGGCCTGACGCACC                                                                                     |

---
