# Supplementary material for: Directed evolution of broadly crossreactive chemokine-blocking antibodies efficacious in arthritis
Source: PubMed Central journal article supplement (PMC5899157; doi:10.1038/s41467-018-03687-x), 2018-04-13
Supplement: 41467_2018_3687_MOESM8_ESM.pdf [file 41467_2018_3687_MOESM8_ESM.pdf]

**Supplementary Data 5 - Protein accession numbers, oligonucleotide primers, DNA and amino-acid sequences of<sup>N</sup>CXCL-Aga2<sup>C</sup> fusion proteins**

| <b>CXCL protein (residues / accession No.)</b> | <b>Construct for expression</b>                              | <b>Fusion protein</b>                  |
|------------------------------------------------|--------------------------------------------------------------|----------------------------------------|
| hCXCL1/GRO $\alpha$ (38–107 / P09341)          | pCHA-LS-hCXCL1 <sup>38-107</sup> -G <sub>3</sub> -c-myc-Aga2 | <sup>N</sup> hCXCL1-Aga2 <sup>C</sup>  |
| hCXCL2/GRO $\beta$ (38–107 / P19875)           | pCHA-LS-hCXCL2 <sup>38-107</sup> -G <sub>3</sub> -c-myc-Aga2 | <sup>N</sup> hCXCL2-Aga2 <sup>C</sup>  |
| hCXCL3/GRO $\gamma$ (38–107 / P19876)          | pCHA-LS-hCXCL3 <sup>38-107</sup> -G <sub>3</sub> -c-myc-Aga2 | <sup>N</sup> hCXCL3-Aga2 <sup>C</sup>  |
| hCXCL4/PF4 (32–101 / P02776)                   | pCHA-LS-hCXCL4 <sup>32-101</sup> -G <sub>3</sub> -c-myc-Aga2 | <sup>N</sup> hCXCL4-Aga2 <sup>C</sup>  |
| hCXCL5/ENA-78 (44–114 / P42830)                | pCHA-LS-hCXCL5 <sup>44-114</sup> -G <sub>3</sub> -c-myc-Aga2 | <sup>N</sup> hCXCL5-Aga2 <sup>C</sup>  |
| hCXCL6/GCP-2 (44–114 / P80162)                 | pCHA-LS-hCXCL6 <sup>44-114</sup> -G <sub>3</sub> -c-myc-Aga2 | <sup>N</sup> hCXCL6-Aga2 <sup>C</sup>  |
| hCXCL7/NAP-2 (59–121 / P02775)                 | pCHA-LS-hCXCL7 <sup>59-121</sup> -G <sub>3</sub> -c-myc-Aga2 | <sup>N</sup> hCXCL7-Aga2 <sup>C</sup>  |
| hCXCL8/IL-8 (29–99 / P10145)                   | pCHA-LS-hCXCL8 <sup>29-99</sup> -G <sub>3</sub> -c-myc-Aga2  | <sup>N</sup> hCXCL8-Aga2 <sup>C</sup>  |
| hCXCL9/MIG (23–125 / Q07325)                   | pCHA-LS-hCXCL9 <sup>23-125</sup> -G <sub>3</sub> -c-myc-Aga2 | <sup>N</sup> hCXCL9-Aga2 <sup>C</sup>  |
| hCXCL10/IP-10 (22–98 / P02778)                 | pCHA-LS-hCXCL10 <sup>22-98</sup> -G <sub>3</sub> -c-myc-Aga2 | <sup>N</sup> hCXCL10-Aga2 <sup>C</sup> |
| hCXCL11/I-TAC (22–94 / O14625)                 | pCHA-LS-hCXCL11 <sup>22-94</sup> -G <sub>3</sub> -c-myc-Aga2 | <sup>N</sup> hCXCL11-Aga2 <sup>C</sup> |
| mCXCL1/KC (28–96 / P12850)                     | pCHA-LS-mCXCL1 <sup>28-96</sup> -G <sub>3</sub> -c-myc-Aga2  | <sup>N</sup> mCXCL1-Aga2 <sup>C</sup>  |
| mCXCL2/MIP-2 (31–100 / P10889)                 | pCHA-LS-mCXCL2 <sup>31-100</sup> -G <sub>3</sub> -c-myc-Aga2 | <sup>N</sup> mCXCL2-Aga2 <sup>C</sup>  |
| mCXCL3/DCIP-1 (31–100 / Q6W5C0)                | pCHA-LS-mCXCL3 <sup>31-100</sup> -G <sub>3</sub> -c-myc-Aga2 | <sup>N</sup> mCXCL3-Aga2 <sup>C</sup>  |

|                                 |                                                               |                                        |
|---------------------------------|---------------------------------------------------------------|----------------------------------------|
| mCXCL4/PF4 (30–105 / Q9Z126)    | pCHA-LS-mCXCL4 <sup>30-105</sup> -G <sub>3</sub> -c-myc-Aga2  | <sup>N</sup> mCXCL4-Aga2 <sup>C</sup>  |
| mCXCL5LIX (48–118 / P50228)     | pCHA-LS-mCXCL5 <sup>48-118</sup> -G <sub>3</sub> -c-myc-Aga2  | <sup>N</sup> mCXCL5-Aga2 <sup>C</sup>  |
| mCXCL7/NAP-2 (48–113 / Q9EQI5)  | pCHA-LS-mCXCL7 <sup>48-113</sup> -G <sub>3</sub> -c-myc-Aga2  | <sup>N</sup> mCXCL7-Aga2 <sup>C</sup>  |
| mCXCL9/MIG (22–126 / P18340)    | pCHA-LS-mCXCL9 <sup>22-126</sup> -G <sub>3</sub> -c-myc-Aga2  | <sup>N</sup> mCXCL9-Aga2 <sup>C</sup>  |
| mCXCL10/IP-10 (22–98 / P17515)  | pCHA-LS-mCXCL10 <sup>22-98</sup> -G <sub>3</sub> -c-myc-Aga2  | <sup>N</sup> mCXCL10-Aga2 <sup>C</sup> |
| mCXCL11/I-TAC (22–100 / Q9JHH5) | pCHA-LS-mCXCL11 <sup>22-100</sup> -G <sub>3</sub> -c-myc-Aga2 | <sup>N</sup> mCXCL11-Aga2 <sup>C</sup> |

| <b>Primer name</b>       | <b>Primer sequence (5' to 3')</b>             |
|--------------------------|-----------------------------------------------|
| Forward-linker-Aga2-pCHA | 5' -GGCGGAGGCGAACAAAAGC-3'                    |
| Reverse-LS-pCHA          | 5' -TCTCTTGTCCAAAGAGCCTTCTGC-3'               |
| Forward-hCXCL1-Aga2      | 5' -TCTTTGGACAAGAGAGCCACCGAGCTGAGATGCC-3'     |
| Reverse-hCXCL1-Aga2      | 5' -GATAAGCTTTTGTTCGCCTCCGCCGTTGCTC-3'        |
| Forward-hCXCL2-Aga2      | 5' -TCTTTGGACAAGAGAGCCACAGAGCTGAGATGCC-3'     |
| Reverse-hCXCL2-Aga2      | 5' -TTGTTTCGCCTCCGCCGTTGCTCTTGCCGTTCTTCAGC-3' |
| Forward-hCXCL3-Aga2      | 5' -TCTTTGGACAAGAGAGTGACCGAGCTGAGATGCC-3'     |
| Reverse-hCXCL3-Aga2      | 5' -TTGTTTCGCCTCCGCCGTTGGTGCTGCCCTTGTTCAGG-3' |
| Forward-hCXCL4-Aga2      | 5' -TCTTTGGACAAGAGAGAGGCTGAAGAGGACGGCG-3'     |
| Reverse-hCXCL4-Aga2      | 5' -TTGTTTCGCCTCCGCCGCTTCCAGCAGCTTCTTGATG-3'  |

|                      |                                             |
|----------------------|---------------------------------------------|
| Forward-hCXCL5-Aga2  | 5' -TCTTTGGACAAGAGACTGCGCGAGCTGAGATGC-3'    |
| Reverse-hCXCL5-Aga2  | 5' -GATAAGCTTTTGTTCGCCTCCGCCGTTCTCTTTG-3'   |
| Forward-hCXCL6-Aga2  | 5' -TCTTTGGACAAGAGACTGACCGAGCTGCGGTGCACC-3' |
| Reverse-hCXCL6-Aga2  | 5' -TTGTTGCCTCCGCCGTTCTTCTTGTGCGCTGTCC-3'   |
| Forward-hCXCL7-Aga2  | 5' -TCTTTGGACAAGAGAGCCGAGCTGCGGTGCATGTGC-3' |
| Reverse-hCXCL7-Aga2  | 5' -TTGTTGCCTCCGCCAGCTTTTTTCTGCACG-3'       |
| Forward-hCXCL8-Aga2  | 5' -TCTTTGGACAAGAGAGCCAAAGAACTGCGGTGCC-3'   |
| Reverse-hCXCL8-Aga2  | 5' -GATAAGCTTTTGTTCGCCTCCGCCGCTGTTC-3'      |
| Forward-hCXCL9-Aga2  | 5' -TCTTTGGACAAGAGAACCCCGTCGTGCGGAAGG-3'    |
| Reverse-hCXCL9-Aga2  | 5' -TTGTTGCCTCCGCCGTGGTTTTTCTTCTGCCGGC-3'   |
| Forward-hCXCL10-Aga2 | 5' -TCTTTGGACAAGAGAGTGCCTCTGAGCAGAACCG-3'   |
| Reverse-hCXCL10-Aga2 | 5' -TTGTTGCCTCCGCCGGGCTCCGCTTGCTCCGC-3'     |
| Forward-hCXCL11-Aga2 | 5' -TCTTTGGACAAGAGATTCCCCATGTTCAAGCGG-3'    |
| Reverse-hCXCL11-Aga2 | 5' -TTGTTGCCTCCGCCGAAGTTCTTCCGTTCCACC-3'    |
| Forward-mCXCL1-Aga2  | 5' -TCTTTGGACAAGAGAGCCAACGAGCTGCGGTG-3'     |
| Reverse-mCXCL1-Aga2  | 5' -GATAAGCTTTTGTTCGCCTCCGCCCTTGGGC-3'      |
| Forward-mCXCL2-Aga2  | 5' -TCTTTGGACAAGAGAGCCAGCGAGCTGCGG-3'       |
| Reverse-mCXCL2-Aga2  | 5' -GATAAGCTTTTGTTCGCCTCCGCCGTTGGC-3'       |

|                      |                                             |
|----------------------|---------------------------------------------|
| Forward-mCXCL3-Aga2  | 5' -TCTTTGGACAAGAGAGCCTCTGAGCTGAGATGCC-3'   |
| Reverse-mCXCL3-Aga2  | 5' -TTGTTGCCTCCGCCGCTGCTCTTGCCGGACTTCAGG-3' |
| Forward-mCXCL4-Aga2  | 5' -TCTTTGGACAAGAGAGTGACATCTGCCGGCCCTG-3'   |
| Reverse-mCXCL4-Aga2  | 5' -TTGTTGCCTCCGCCGCTTCCAGGATCTTCTTAATC-3'  |
| Forward-mCXCL5-Aga2  | 5' -TCTTTGGACAAGAGAGCCACCGAGCTGAGATGC-3'    |
| Reverse-mCXCL5-Aga2  | 5' -GATAAGCTTTTGTTCGCCTCCGCCGGCTTTC-3'      |
| Forward-mCXCL7-Aga2  | 5' -TCTTTGGACAAGAGAATCGAGCTGCGGTGCCGGTGC-3' |
| Reverse-mCXCL7-Aga2  | 5' -TTGTTGCCTCCGCCGTAGCCTTCCAGAATCTTCATC-3' |
| Forward-mCXCL9-Aga2  | 5' -TCTTTGGACAAGAGAACCCTCGTGATCCGGAACG-3'   |
| Reverse-mCXCL9-Aga2  | 5' -TTGTTGCCTCCGCCGTGGTCTTTCTGGATCTCC-3'    |
| Forward-mCXCL10-Aga2 | 5' -TCTTTGGACAAGAGAATCCCCTGGCCAGAACCG-3'    |
| Reverse-mCXCL10-Aga2 | 5' -TTGTTGCCTCCGCCGGGGCCCTCTTGCTCCG-3'      |
| Forward-mCXCL11-Aga2 | 5' -TCTTTGGACAAGAGATTCCCTGATGTTCAAGCAGG-3'  |
| Reverse-mCXCL11-Aga2 | 5' -TTGTTGCCTCCGCCCATGTTCTGCCGCCGCAGG-3'    |

---

**Sequences of genes coding for ELR<sup>+</sup> and ELR<sup>-</sup> CXC chemokines fused to the N-terminus of a-agglutinin Aga2 protein (Aga2p): <sup>N</sup>CXCL-Aga2<sup>C</sup>**

DNA sequences of genes are provided. Start and stop codons are shown in black bold. The sequences include the secretory leader peptide (LS, in grey underlined), an active form of CXCL (in blue bold), a tripeptide (Gly)<sub>3</sub> flexible linker (G<sub>3</sub>, in black italic and underlined), the c-myc tag (c-myc, in red bold) and the a-agglutinin Aga2 protein (Aga2p, in grey).

*pCHA-LS-hCXCL1<sup>38-107</sup>-G<sub>3</sub>-c-myc-Aga2*

**ATG**AAGGTTTTGATTGTCTTGTGGCTATCTTCGCTGCTTTGCCATTGGCCTTAGCTCAACCGGTTATTTCTACTACCGTCGGTTCCGCTGCAGAAGGCTC  
TTTGGACAAGAGA**GCCACCGAGCTGAGATGCCAGTGCCTGCAGACCCTGCAGGGCATCCACCCAAGAACATCCAGAGCGTGAACGTGAAGTCCCCTGGCC**  
**CCCCTGCGCCAGACCGAAGTGATCGCCACCCTGAAGAACGGCCGGAAGGCCTGCCTGAACCCCGCCAGCCCCATCGTGAAGAAAATCATCGAGAAGATG**  
**CTGAACAGCGACAAGAGCAAC**GGCGGAGGC**GAACAAAAGCTTATCTCCGAAGAAGACTTG**CAGGAACTGACAACATATATGCGAGCAAATCCCCTCACCAAC  
TTTAGAATCGACGCCGTACTCTTTGTCAACGACTACTATTTTGGCCAACGGGAAGGCAATGCAAGGAGTTTTTGAATATTACAAATCAGTAACGTTTTGTCA  
GTAATTGCGGTTCTCACCCCTCAACAACACTAGCAAAGGCAGCCCCATAAACACACAGTATGTTTTTT**TAA**

*pCHA-LS-hCXCL2<sup>38-107</sup>-G<sub>3</sub>-c-myc-Aga2*

**ATG**AAGGTTTTGATTGTCTTGTGGCTATCTTCGCTGCTTTGCCATTGGCCTTAGCTCAACCGGTTATTTCTACTACCGTCGGTTCCGCTGCAGAAGGCTC  
TTTGGACAAGAGA**GCCACAGAGCTGAGATGCCAGTGCCTCCAGACACTCCAGGGCATCCACCTGAAGAACATCCAGAGCGTGAAGTGAAGTCCCCTGGCC**  
**CCCCTGCGCCAGACAGAAGTGATCGCCACCCTGAAGAATGGCCAGAAGGCCTGCCTGAACCCCGCCAGCCCTATGGTCAAGAAAATCATCGAGAAGATG**  
**CTGAAGAACGGCAAGAGCAAC**GGCGGAGGC**GAACAAAAGCTTATCTCCGAAGAAGACTTG**CAGGAACTGACAACATATATGCGAGCAAATCCCCTCACCAAC  
TTTAGAATCGACGCCGTACTCTTTGTCAACGACTACTATTTTGGCCAACGGGAAGGCAATGCAAGGAGTTTTTGAATATTACAAATCAGTAACGTTTTGTCA  
GTAATTGCGGTTCTCACCCCTCAACAACACTAGCAAAGGCAGCCCCATAAACACACAGTATGTTTTTT**TAA**

*pCHA-LS-hCXCL3<sup>38-107</sup>-G<sub>3</sub>-c-myc-Aga2*

**ATG**AAGGTTTTGATTGTCTTGTGGCTATCTTCGCTGCTTTGCCATTGGCCTTAGCTCAACCGGTTATTTCTACTACCGTCGGTTCCGCTGCAGAAGGCTC  
TTTGGACAAGAGA**GTGACCGAGCTGAGATGCCAGTGCCTCCAGACACTCCAGGGCATCCACCTGAAGAACATCCAGAGCGTGAACGTGCGGAGCCCTGGCC**  
**CTCATTGTGCCAGACAGAAGTGATCGCCACCCTGAAGAATGGCAAGAAGGCCTGCCTGAACCCCGCCAGCCCTATGGTGCAGAAGATCATCGAGAAGATC**  
**CTGAACAAGGGCAGCACCAAC**GGCGGAGGC**GAACAAAAGCTTATCTCCGAAGAAGACTTG**CAGGAACTGACAACATATATGCGAGCAAATCCCCTCACCAAC

TTTAGAATCGACGCCGTACTCTTTGTCAACGACTACTATTTTGGCCAACGGGAAGGCAATGCAAGGAGTTTTTGAATATTACAAATCAGTAACGTTTGTCA  
GTAATTGCGGTTCTCACCCCTCAACAAGTAGCAAAGGCAGCCCCATAAACACACAGTATGTTTTTT**TAA**

*pCHA-LS-hCXCL4<sup>32-101</sup>-G<sub>3</sub>-c-myc-Aga2*

**ATG**AAGGTTTTGATTGTCTTGTGGCTATCTTCGCTGCTTTGCCATTGGCCTTAGCTCAACCGGTTATTTCTACTACCGTTCGGTTCGGCTGCAGAAGGCTC  
TTTGGACAAGAGA **GAGGCTGAAGAGGACGGCGATCTCCAGTGCCTGTGCGTGAAAACCACCAGCCAAGTGCGGCCAGACACATCACCAGCCTGGAAGTGA**  
**TCAAGGCCGGACCCCACTGTCTACCGCCAGCTGATTGCCACCCTGAAGAACGGCCGGAAGATCTGCCTGGACCTCCAGGCCCCCTGTACAAGAAGATC**  
**ATCAAGAAGCTGCTGGAAAGC**GGCGGAGGC**GAACAAAAGCTTATCTCCGAAGAAGACTTG**CAGGAACTGACAACATATATGCGAGCAAATCCCCTCACCAAC  
TTTAGAATCGACGCCGTACTCTTTGTCAACGACTACTATTTTGGCCAACGGGAAGGCAATGCAAGGAGTTTTTGAATATTACAAATCAGTAACGTTTGTCA  
GTAATTGCGGTTCTCACCCCTCAACAAGTAGCAAAGGCAGCCCCATAAACACACAGTATGTTTTTT**TAA**

*pCHA-LS-hCXCL5<sup>44-114</sup>-G<sub>3</sub>-c-myc-Aga2*

**ATG**AAGGTTTTGATTGTCTTGTGGCTATCTTCGCTGCTTTGCCATTGGCCTTAGCTCAACCGGTTATTTCTACTACCGTTCGGTTCGGCTGCAGAAGGCTC  
TTTGGACAAGAGA **CTGCGCGAGCTGAGATGCGTGTGCCTGCAGACCACCCAGGGCGTGCACCCCAAGATGATCAGCAACCTCCAGGTGTTCCGCATCGGCC**  
**CCCAGTGCAGCAAGGTGGAAGTGGTGGCCAGCCTGAAGAACGGCAAAGAGATCTGCCTGGACCCCGAGGCCCCATTCTGAAGAAAGTGATCCAGAAGATC**  
**CTGGACGGCGGCAACAAGAGAAC**GGCGGAGGC**GAACAAAAGCTTATCTCCGAAGAAGACTTG**CAGGAACTGACAACATATATGCGAGCAAATCCCCTCACC  
AACTTTAGAATCGACGCCGTACTCTTTGTCAACGACTACTATTTTGGCCAACGGGAAGGCAATGCAAGGAGTTTTTGAATATTACAAATCAGTAACGTTTGT  
TCAGTAATTGCGGTTCTCACCCCTCAACAAGTAGCAAAGGCAGCCCCATAAACACACAGTATGTTTTTT**TAA**

*pCHA-LS-hCXCL6<sup>44-114</sup>-G<sub>3</sub>-c-myc-Aga2*

**ATG**AAGGTTTTGATTGTCTTGTGGCTATCTTCGCTGCTTTGCCATTGGCCTTAGCTCAACCGGTTATTTCTACTACCGTTCGGTTCGGCTGCAGAAGGCTC  
TTTGGACAAGAGA **CTGACCGAGCTGCGGTGCACCTGTCTGAGAGTGACCCTGCGCGTGAACCCCAAGACCATCGGCAAGCTCCAGGTGTTCCCTGCCGGCC**  
**CTCAGTGCAGCAAGGTGGAAGTGGTGGCCAGCCTGAAAAACGGAAAACAAGTGTGCCTGGACCCCGAGGCCCCATTCTGAAGAAAGTGATCCAGAAGATC**  
**CTGGACAGCGGCAACAAGAAGAAC**GGCGGAGGC**GAACAAAAGCTTATCTCCGAAGAAGACTTG**CAGGAACTGACAACATATATGCGAGCAAATCCCCTCACC  
AACTTTAGAATCGACGCCGTACTCTTTGTCAACGACTACTATTTTGGCCAACGGGAAGGCAATGCAAGGAGTTTTTGAATATTACAAATCAGTAACGTTTGT  
TCAGTAATTGCGGTTCTCACCCCTCAACAAGTAGCAAAGGCAGCCCCATAAACACACAGTATGTTTTTT**TAA**

*pCHA-LS-hCXCL7<sup>59-121</sup>-G<sub>3</sub>-c-myc-Aga2*

**ATG**AAGGTTTTGATTGTCTTGTTGGCTATCTTCGCTGCTTTGCCATTGGCCTTAGCTCAACCGGTTATTTCTACTACCGTCGGTTCGGCTGCAGAAGGCTC  
TTTGGACAAGAGAG**GCCGAGCTGCGGTGCATGTGCATCAAGACCACCAGCGGAATCCACCCCAAGAATATCCAGTCCCTGGAAGTGATTGGCAAGGGCACCC**  
**ACTGCAACCAGGTGGAAGTGATTGCCACACTGAAAGACGGCCGGAAGATCTGCCTGGACCCTGACGCCCCAGAATCAAGAAAATCGTGCAGAAAAAGCTG**  
**GGCGGAGGC****GAACAAAAGCTTATCTCCGAAGAAGACTTG**CAGGAACTGACAACCTATATGCGAGCAAATCCCCTCACCAACTTTAGAATCGACGCCGTACTC  
TTTGTCAACGACTACTATTTTGGCCAACGGGAAGGCAATGCAAGGAGTTTTTGAATATTACAAATCAGTAACGTTTGTGTAATTTGCGGTTCTCACCCCT  
CAACAACCTAGCAAAGGCAGCCCCATAAACACACAGTATGTTTTTT**TAA**

*pCHA-LS-hCXCL8<sup>29-99</sup>-G<sub>3</sub>-c-myc-Aga2*

**ATG**AAGGTTTTGATTGTCTTGTTGGCTATCTTCGCTGCTTTGCCATTGGCCTTAGCTCAACCGGTTATTTCTACTACCGTCGGTTCGGCTGCAGAAGGCTC  
TTTGGACAAGAGAG**GCCAAAGAAGCTGCGGTGCCAGTGCATCAAGACCTACAGCAAGCCCTTCCACCCCAAGTTCATCAAAGAAGCTGAGAGTGATCGAGAGCG**  
**GCCCTCACTGCGCCAACACCGAGATCATCGTGAAGCTGAGCGACGGCAGAGAGCTGTGCCTGGACCCCAAAGAAAAGCTGGGTGCAGCGGGTGGTGGAAAAG**  
**TTCTGAAGCGGGCCGAGAAGCAGC****GGCGGAGGC****GAACAAAAGCTTATCTCCGAAGAAGACTTG**CAGGAACTGACAACCTATATGCGAGCAAATCCCCTCACCA  
AACTTTAGAATCGACGCCGTACTCTTTGTCAACGACTACTATTTTGGCCAACGGGAAGGCAATGCAAGGAGTTTTTGAATATTACAAATCAGTAACGTTTGTG  
TCAGTAATTGCGGTTCTCACCCCTCAACAACCTAGCAAAGGCAGCCCCATAAACACACAGTATGTTTTTT**TAA**

*pCHA-LS-hCXCL9<sup>23-115</sup>-G<sub>3</sub>-c-myc-Aga2*

**ATG**AAGGTTTTGATTGTCTTGTTGGCTATCTTCGCTGCTTTGCCATTGGCCTTAGCTCAACCGGTTATTTCTACTACCGTCGGTTCGGCTGCAGAAGGCTC  
TTTGGACAAGAGAG**ACCCCGTCGTGCGGAAGGGCAGATGCAGCTGTATCAGCACCAACCAGGGCACCATCCATCTCCAGTCTCTGAAGGACCTGAAGCAGT**  
**TCGCCCCAGCCCCAGCTGCGAGAAGATCGAGATTATCGCCACACTGAAAAACGGGGTGCAGACCTGCCTGAACCCCGACAGCGCCGACGTGAAAGAAGCTG**  
**ATCAAGAAATGGGAGAAACAGGTGTCCCGAAGAAGAAGCAGAAGAAGCGAAAGAAGCACCAGAAAAAGAAAGTGCTGAAAGTGCGGAAGTCCCAGCGGAG**  
**CCGGCAGAAGAAAACCACA****GGCGGAGGC****GAACAAAAGCTTATCTCCGAAGAAGACTTG**CAGGAACTGACAACCTATATGCGAGCAAATCCCCTCACCAACTT  
TAGAATCGACGCCGTACTCTTTGTCAACGACTACTATTTTGGCCAACGGGAAGGCAATGCAAGGAGTTTTTGAATATTACAAATCAGTAACGTTTGTGTAAT  
AATTGCGGTTCTCACCCCTCAACAACCTAGCAAAGGCAGCCCCATAAACACACAGTATGTTTTTT**TAA**

*pCHA-LS-hCXCL10<sup>22-98</sup>-G<sub>3</sub>-c-myc-Aga2*

**ATG**AAGGTTTTGATTGTCTTGTTGGCTATCTTCGCTGCTTTGCCATTGGCCTTAGCTCAACCGGTTATTTCTACTACCGTCGGTTCGGCTGCAGAAGGCTC  
TTTGGACAAGAGAG**GTGCCTCTGAGCAGAACCCTGCGGTGCACCTGTATCAGCATCAGCAACCAGCCCGTGAACCCAGAAGCTGGAAAAGCTGGAAATCA**  
**TCCCGCCAGCCAGTTCTGCCCCAGAGTGAAATTTATCGCCACCATGAAGAAGAAAGGCGAGAAGCGGTGCCTGAACCCCGAGAGCAAGGCCATCAAGAAC**  
**CTGCTGAAGGCCGTGTCCAAAGAGCGGAGCAAGCGGAGCCCA****GGCGGAGGC****GAACAAAAGCTTATCTCCGAAGAAGACTTG**CAGGAACTGACAACCTATATG  
CGAGCAAATCCCCTCACCAACTTTAGAATCGACGCCGTACTCTTTGTCAACGACTACTATTTTGGCCAACGGGAAGGCAATGCAAGGAGTTTTTGAATATT  
ACAAATCAGTAACGTTTGTGTAATTTGCGGTTCTCACCCCTCAACAACCTAGCAAAGGCAGCCCCATAAACACACAGTATGTTTTTT**TAA**

*pCHA-LS-hCXCL11<sup>22-94</sup>-G<sub>3</sub>-c-myc-Aga2*

**ATG**AAGGTTTTGATTGTCTTGTTGGCTATCTTCGCTGCTTTGCCATTGGCCTTAGCTCAACCGTTATTTCTACTACCGTCGGTCCGCTGCAGAAGGCTC  
TTTGGACAAGAGAGATTCCCATGTTCAAGCGGGGCAGATGCCTGTGCATCGGCCCTGGCGTGAAAGCCGTGAAGGTGGCCGATATCGAGAAGGCCAGCATCA  
TGTACCCAGCAACAAGTGCAGACAAGATCGAAGTGATCATCACCTGAAAGAGAACAAGGGCCAGAGATGCCTGAATCCCAAGTCCAAGCAGGCCCGGCTG  
ATCATCAAGAAGGTGGAACGGAAGAAGCTTCGGCGGAGGC**GAACAAAAGCTTATCTCCGAAGAAGACTTG**CAGGAACTGACAACCTATATGCGAGCAAATCCC  
CTCACCAACTTTAGAATCGACGCCGTACTCTTTGTCAACGACTACTATTTTGGCCAACGGGAAGGCAATGCAAGGAGTTTTTGAATATTACAAATCAGTAA  
CGTTTTGTGTAATTGCGGTTCTCACCCCTCAACAAGGCAAGGCCAGCCCATAAACACACAGTATGTTTTTT**TAA**

*pCHA-LS-mCXCL1<sup>28-96</sup>-G<sub>3</sub>-c-myc-Aga2*

**ATG**AAGGTTTTGATTGTCTTGTTGGCTATCTTCGCTGCTTTGCCATTGGCCTTAGCTCAACCGTTATTTCTACTACCGTCGGTCCGCTGCAGAAGGCTC  
TTTGGACAAGAGAGAGCCAACGAGCTGCGGTGCCAGTGCCTGCAGACCATGGCCGGCATCCACCTGAAGAACATCCAGAGCCTGAAGGTGCTGCCAGCGGCC  
CTCACTGCACCCAGACCGAAGTGATCGCCACCCTGAAGAACGGCAGAGAGGCTGCCTGGATCCCAGGCCCCCTGGTGCAGAAAATCGTGCAGAAAATG  
CTGAAGGGCGTGCCCAAGGGCGGAGGC**GAACAAAAGCTTATCTCCGAAGAAGACTTG**CAGGAACTGACAACCTATATGCGAGCAAATCCCCTCACCAACTTT  
AGAATCGACGCCGTACTCTTTGTCAACGACTACTATTTTGGCCAACGGGAAGGCAATGCAAGGAGTTTTTGAATATTACAAATCAGTAAACGTTTTGTGTA  
ATTGCGGTTCTCACCCCTCAACAAGGCAAGGCCAGCCCATAAACACACAGTATGTTTTTT**TAA**

*pCHA-LS-mCXCL2<sup>31-100</sup>-G<sub>3</sub>-c-myc-Aga2*

**ATG**AAGGTTTTGATTGTCTTGTTGGCTATCTTCGCTGCTTTGCCATTGGCCTTAGCTCAACCGTTATTTCTACTACCGTCGGTCCGCTGCAGAAGGCTC  
TTTGGACAAGAGAGAGCCAGCGAGCTGCGGTGCCAGTGCCTGAAAACCTGCCCGGGTGGACTTCAAGAACATCCAGAGCCTGAGCGTGACCCCCCTGGCC  
CTCACTGTGCCAGACCGAAGTGATCGCCACCCTGAAGGGCGGCCAGAAAGTGTGCCTGGACCCCGAGGCCCCCTGGTGCAGAAGATCATCCAGAAGATC  
CTGAACAAGGGCAAGGCCAACGGCGGAGGC**GAACAAAAGCTTATCTCCGAAGAAGACTTG**CAGGAACTGACAACCTATATGCGAGCAAATCCCCTCACCAAC  
TTTAGAATCGACGCCGTACTCTTTGTCAACGACTACTATTTTGGCCAACGGGAAGGCAATGCAAGGAGTTTTTGAATATTACAAATCAGTAAACGTTTTGTCA  
GTAATTGCGGTTCTCACCCCTCAACAAGGCAAGGCCAGCCCATAAACACACAGTATGTTTTTT**TAA**

*pCHA-LS-mCXCL3<sup>31-100</sup>-G<sub>3</sub>-c-myc-Aga2*

**ATG**AAGGTTTTGATTGTCTTGTTGGCTATCTTCGCTGCTTTGCCATTGGCCTTAGCTCAACCGTTATTTCTACTACCGTCGGTCCGCTGCAGAAGGCTC  
TTTGGACAAGAGAGAGCCTCTGAGCTGAGATGCCAGTGCCTGAACACCCTGCCCGGGTGGACTTCGAGACAATCCAGAGCCTGACCGTGACCCCCCTGGCC  
CTCACTGTACCCAGACAGAAGTGATCGCCACCCTGAAGGACGGCCAGGAAGTGTGCCTGAATCCCAGGGCCCCAGACTCCAGATCATCATCAAGAAGATC  
CTGAAGTCCGGCAAGAGCAGCGGCGGAGGC**GAACAAAAGCTTATCTCCGAAGAAGACTTG**CAGGAACTGACAACCTATATGCGAGCAAATCCCCTCACCAAC  
TTTAGAATCGACGCCGTACTCTTTGTCAACGACTACTATTTTGGCCAACGGGAAGGCAATGCAAGGAGTTTTTGAATATTACAAATCAGTAAACGTTTTGTCA  
GTAATTGCGGTTCTCACCCCTCAACAAGGCAAGGCCAGCCCATAAACACACAGTATGTTTTTT**TAA**



*pCHA-LS-mCXCL4<sup>30-105</sup>-G<sub>3</sub>-c-myc-Aga2*

**ATG**AAGGTTTTGATTGTCTTGTGGCTATCTTCGCTGCTTTGCCATTGGCCTTAGCTCAACCGGTTATTTCTACTACCGTCGGTCCGCTGCAGAAGGCTC  
TTTGGACAAGAGAG**GTGACATCTGCCGGCCTGAGGAAAGCGACGGCGATCTGTCTTGCCTGTGCGTGAAAACCATCAGCAGCGGCATCCACCTGAAGCACA**  
**TCACCAGCCTGGAAGTGATCAAGGCCGGCAGGCACTGTGCCGTGCCTCAGCTGATTGCCACCCTGAAGAACGGCCGGAAGATCTGCCTGGACAGACAGGCC**  
**CCCCTGTACAAGAAAGTGATTAAGAAGATCCTGGAAAGC**GGCGGAGGC**GAACAAAAGCTTATCTCCGAAGAAGACTTG**CAGGAACTGACAACCTATATGCGA  
GCAAAATCCCCTCACCAACTTTAGAATCGACGCCGTACTCTTTGTCAACGACTACTATTTTGGCCAACGGGAAGGCAATGCAAGGAGTTTTTGAATATTACA  
AATCAGTAACGTTTGTGAGTAATTGCGGTTCTCACCCCTCAACAACCTAGCAAAGGCAGCCCCATAAACACACAGTATGTTTTTT**TAA**

*pCHA-LS-mCXCL5<sup>48-118</sup>-G<sub>3</sub>-c-myc-Aga2*

**ATG**AAGGTTTTGATTGTCTTGTGGCTATCTTCGCTGCTTTGCCATTGGCCTTAGCTCAACCGGTTATTTCTACTACCGTCGGTCCGCTGCAGAAGGCTC  
TTTGGACAAGAGAG**GCCACCGAGCTGAGATGCGTGTGCCTGACCGTGACCCCAAGATCAACCCCAAGCTGATCGCCAACCTGGAAGTGATCCCTGCCGGCC**  
**CTCAGTGCCCCACCGTGGAAGTGATTGCCAAGCTGAAGAACCAGAAAGAAGTGTGCCTGGACCCCGAGGCCCCCGTGATCAAGAAGATCATCCAGAAGATC**  
**CTGGGCAGCGACAAGAAGAAAGCC**GGCGGAGGC**GAACAAAAGCTTATCTCCGAAGAAGACTTG**CAGGAACTGACAACCTATATGCGAGCAAATCCCCTCAC  
AACTTTAGAATCGACGCCGTACTCTTTGTCAACGACTACTATTTTGGCCAACGGGAAGGCAATGCAAGGAGTTTTTGAATATTACAAATCAGTAACGTTTG  
TCAGTAATTGCGGTTCTCACCCCTCAACAACCTAGCAAAGGCAGCCCCATAAACACACAGTATGTTTTTT**TAA**

*pCHA-LS-mCXCL7<sup>48-113</sup>-G<sub>3</sub>-c-myc-Aga2*

**ATG**AAGGTTTTGATTGTCTTGTGGCTATCTTCGCTGCTTTGCCATTGGCCTTAGCTCAACCGGTTATTTCTACTACCGTCGGTCCGCTGCAGAAGGCTC  
TTTGGACAAGAGAG**ATCGAGCTGCGGTGCCGGTGACCAACACCATCAGCGGCATCCCTTTCAACAGCATCAGCCTCGTGAACGTGTACAGACCCGGCGTGC**  
**ACTGCGCCGACGTGGAAGTGATTGCTACACTGAAGAATGGGCAGAAAACCTGCCTGGACCCCAACGCCCTGGCGTGAAGCGGATCGTGATGAAGATTCTG**  
**GAAGGCTAC**GGCGGAGGC**GAACAAAAGCTTATCTCCGAAGAAGACTTG**CAGGAACTGACAACCTATATGCGAGCAAATCCCCTCACCAACTTTAGAATCGAC  
GCCGTACTCTTTGTCAACGACTACTATTTTGGCCAACGGGAAGGCAATGCAAGGAGTTTTTGAATATTACAAATCAGTAACGTTTGTGAGTAATTGCGGTT  
CTCACCCCTCAACAACCTAGCAAAGGCAGCCCCATAAACACACAGTATGTTTTTT**TAA**

*pCHA-LS-mCXCL9<sup>22-126</sup>-G<sub>3</sub>-c-myc-Aga2*

**ATG**AAGGTTTTGATTGTCTTGTGGCTATCTTCGCTGCTTTGCCATTGGCCTTAGCTCAACCGGTTATTTCTACTACCGTCGGTCCGCTGCAGAAGGCTC  
TTTGGACAAGAGAG**ACCCTCGTGATCCGGAACGCCGGTGACGCTGTATCAGCACCAGCAGAGGCACCATCCACTACAAGAGCCTGAAGGATCTGAAGCAGT**  
**TCGCCCCAGCCCCAACTGCAACAAGACCGAGATTATCGCCACACTGAAAAACGGGGACCAGACCTGTCTGGACCCCGACAGCGCCAACGTGAAGAACTG**  
**ATGAAGGAATGGGAGAAGAAGATCAGCCAGAAGAAGAAGCAGAAGCGGGCAAGAAAACACCAGAAAAACATGAAGAACCAGGACCCCAAGACCCCCAGAG**  
**CCGGCGGAGATCCAGAAAGACCACA**GGCGGAGGC**GAACAAAAGCTTATCTCCGAAGAAGACTTG**CAGGAACTGACAACCTATATGCGAGCAAATCCCCTCAC  
CAACTTTAGAATCGACGCCGTACTCTTTGTCAACGACTACTATTTTGGCCAACGGGAAGGCAATGCAAGGAGTTTTTGAATATTACAAATCAGTAACGTTT  
GTCAGTAATTGCGGTTCTCACCCCTCAACAACCTAGCAAAGGCAGCCCCATAAACACACAGTATGTTTTTT**TAA**

*pCHA-LS-mCXCL10<sup>22-98</sup>-G<sub>3</sub>-c-myc-Aga2*

**ATG**AAGGTTTTGATTGTCTTGTTGGCTATCTTCGCTGCTTTGCCATTGGCCTTAGCTCAACCGGTTATTTCTACTACCGTCGGTTCGGCTGCAGAAGGCTC  
TTTGGACAAGAGAGATCCCACTGGCCAGAACCCTGCGGTGCAACTGCATCCACATCGACGATGGCCCCGTGCGGATGAGAGCCATCGGCAAGCTGGAAATCA  
TCCCCGCCAGCCTGAGCTGCCCCAGAGTGAAATTATCGCCACCATGAAGAAGAACGACGAGCAGCGGTGCCTGAACCCCGAGAGCAAGACCATCAAGAAC  
CTGATGAAGGCCTTTAGCCAGAAGCGGAGCAAGAGGGCCCCAGGCGGAGGC**GAACAAAAGCTTATCTCCGAAGAAGACTTG**CAGGAACTGACAACATATATG  
CGAGCAAATCCCCTCACCAACTTTAGAATCGACGCCGTACTCTTTGTCAACGACTACTATTTTGGCCAACGGGAAGGCAATGCAAGGAGTTTTTGAATATT  
ACAAATCAGTAACGTTTTGTAGTAATTGCGGTTCTCACCCCTCAACAACCTAGCAAAGGCAGCCCCATAAACACACAGTATGTTTTTT**TAA**

*pCHA-LS-mCXCL11<sup>22-100</sup>-G<sub>3</sub>-c-myc-Aga2*

**ATG**AAGGTTTTGATTGTCTTGTTGGCTATCTTCGCTGCTTTGCCATTGGCCTTAGCTCAACCGGTTATTTCTACTACCGTCGGTTCGGCTGCAGAAGGCTC  
TTTGGACAAGAGAGATTCCTGATGTTCAAGCAGGGCCGGTGCCTGTGCATCGGCCCTGGAATGAAGGCCGTGAAGATGGCCGAGATCGAGAAGGCCAGCGTGA  
TCTACCCAGCAACGGCTGCGACAAGGTGGAAGTGATCGTGACCATGAAGGCCACAAGCGGCAGAGATGCCTGGACCCAGATCCAAGCAGGCCCGGCTG  
**ATCATGCAGGCTATCGAGAAGAAGAATTTCTGCGGCGGCAGAACATG**GGCGGAGGC**GAACAAAAGCTTATCTCCGAAGAAGACTTG**CAGGAACTGACAAC  
TATATGCGAGCAAATCCCCTCACCAACTTTAGAATCGACGCCGTACTCTTTGTCAACGACTACTATTTTGGCCAACGGGAAGGCAATGCAAGGAGTTTTTG  
AATATTACAAATCAGTAACGTTTTGTAGTAATTGCGGTTCTCACCCCTCAACAACCTAGCAAAGGCAGCCCCATAAACACACAGTATGTTTTTT**TAA**

**Amino-acid sequences of ELR<sup>+</sup> and ELR<sup>-</sup> CXC chemokines fused to the N-terminus of a-agglutinin Aga2 protein (Aga2p): <sup>N</sup>CXCL-Aga2<sup>C</sup>**

Amino acid sequences of translated polypeptides are shown. The sequences include the secretory leader peptide (LS, in grey underlined), an active form of CXCL (in blue bold), a tripeptide (Gly)<sub>3</sub> flexible linker (G<sub>3</sub>, in black italic and underlined), the c-myc tag (c-myc, in red bold) and the a-agglutinin Aga2 protein (Aga2p, in grey).

*LS-hCXCL1<sup>38-107</sup>-G<sub>3</sub>-c-myc-Aga2*

MKVLIVLLAIFAALPLALAQPVISTTVGSAAEGLDKR**ATELRCQCLQTLQGIHPKNIQSVNVKSPGPHCAQTEVIATLKNGRKACLNPASPIVKKIIEKM**  
**LNSDKSN**GGGEQKLISEEDLQELTTICEQIPSPBLESTPYSLSTTTILANGKAMQGVFEYYKSVTFVSNCGSHPSTTSKGSPINTQYVF-

*LS-hCXCL2<sup>38-107</sup>-G<sub>3</sub>-c-myc-Aga2*

MKVLIVLLAIFAALPLALAQPVISTTVGSAAEGLDKR**ATELRCQCLQTLQGIHLKNIQSVKVKSPGPHCAQTEVIATLKNQKACLNPASPMVKKIIEKM**  
**LKNGKSN**GGGEQKLISEEDLQELTTICEQIPSPBLESTPYSLSTTTILANGKAMQGVFEYYKSVTFVSNCGSHPSTTSKGSPINTQYVF-

*LS-hCXCL3<sup>38-107</sup>-G<sub>3</sub>-c-myc-Aga2*

MKVLIVLLAIFAALPLALAQPVISTTVGSAAEGLDKR**VTELRCQCLQTLQGIHLKNIQSVNVRSPGPHCAQTEVIATLKNKKACLNPASPMVQKIIEKI**  
**LKNGSTN**GGGEQKLISEEDLQELTTICEQIPSPBLESTPYSLSTTTILANGKAMQGVFEYYKSVTFVSNCGSHPSTTSKGSPINTQYVF-

*LS-hCXCL4<sup>32-101</sup>-G<sub>3</sub>-c-myc-Aga2*

MKVLIVLLAIFAALPLALAQPVISTTVGSAAEGLDKR**EAEEDGDLQCLCVKTTTSQVRPRHITSLEVIKAGPHCPTAQLIATLKNGRKICLDLQAPLYKKI**  
**IKKLES**GGGEQKLISEEDLQELTTICEQIPSPBLESTPYSLSTTTILANGKAMQGVFEYYKSVTFVSNCGSHPSTTSKGSPINTQYVF-

*LS-hCXCL5<sup>44-114</sup>-G<sub>3</sub>-c-myc-Aga2*

MKVLIVLLAIFAALPLALAQPVISTTVGSAAEGLDKR**LRELRCVCLQTTQGVHPKMISNLQVFAIGPQCSKVEVVASLKNKEICLDPEAPFLKKVIQKI**  
**LDGGNKEN**GGGEQKLISEEDLQELTTICEQIPSPBLESTPYSLSTTTILANGKAMQGVFEYYKSVTFVSNCGSHPSTTSKGSPINTQYVF-

*LS-hCXCL6<sup>44-114</sup>-G<sub>3</sub>-c-myc-Aga2*

MKVLIVLLAIFAALPLALAQPVIISTTVGSAAEGSLDKR**LTELRC**TCLRVTLRVNPKTIGKLQVFPAGPQCSKVEVVASLKNGKQVCLDPEAPFLKKVIQKI  
**LDSGNKKN**GGGEQKLISEEDLQELTTICEQIPSPITLSTPYSLSTTTILANGKAMQGVFEYYKSVTFVSNCGSHPSTTSKGGSPINTQYVF-

*LS-hCXCL7<sup>59-121</sup>-G<sub>3</sub>-c-myc-Aga2*

MKVLIVLLAIFAALPLALAQPVIISTTVGSAAEGSLDKR**AELRCMC**IKTTS<sup>59-121</sup>SGIHPKNIQSLEVIKGTGHCNQEVIATLKDGRKICLDPDAPRIKKIVQKKL  
GGGEQKLISEEDLQELTTICEQIPSPITLSTPYSLSTTTILANGKAMQGVFEYYKSVTFVSNCGSHPSTTSKGGSPINTQYVF-

*LS-hCXCL8<sup>29-99</sup>-G<sub>3</sub>-c-myc-Aga2*

MKVLIVLLAIFAALPLALAQPVIISTTVGSAAEGSLDKR**AKELRCQ**CIKTYSKPFHPKFIKELRVIESGPHCANTEIIVKLSDGRELCLDPKENWVQRVVEK  
**FLKRAENS**GGGEQKLISEEDLQELTTICEQIPSPITLSTPYSLSTTTILANGKAMQGVFEYYKSVTFVSNCGSHPSTTSKGGSPINTQYVF-

*LS-hCXCL9<sup>23-115</sup>-G<sub>3</sub>-c-myc-Aga2*

MKVLIVLLAIFAALPLALAQPVIISTTVGSAAEGSLDKR**TPVVRKGR**CSCISTNQGTHLQSLKDLKQFAPSPSCEKIEIIATLKNQVQTCINPDSADVKEK  
**IKKWEKQVSQKKKQKNGKHKKQKVKVRKSQRSRQKKT**GGGEQKLISEEDLQELTTICEQIPSPITLSTPYSLSTTTILANGKAMQGVFEYYKSVTFVSNCGSHPSTTSKGGSPINTQYVF-

*LS-hCXCL10<sup>22-98</sup>-G<sub>3</sub>-c-myc-Aga2*

MKVLIVLLAIFAALPLALAQPVIISTTVGSAAEGSLDKR**VPLSRTV**RCTCISISNQPVNPRSLEKLEIIPASQFCPRVEIATMKKKGEKRCINPESKAIKN  
**LLKAVSKERSKRSP**GGGEQKLISEEDLQELTTICEQIPSPITLSTPYSLSTTTILANGKAMQGVFEYYKSVTFVSNCGSHPSTTSKGGSPINTQYVF-

*LS-hCXCL11<sup>22-94</sup>-G<sub>3</sub>-c-myc-Aga2*

MKVLIVLLAIFAALPLALAQPVIISTTVGSAAEGSLDKR**FPMFKRGR**CLCIGPGVKAVKVADIEKASIMYPSNNDKIEVIITLKENKGQRCINPKSKQARL  
**I**IKKVERKNFGGGEQKLISEEDLQELTTICEQIPSPITLSTPYSLSTTTILANGKAMQGVFEYYKSVTFVSNCGSHPSTTSKGGSPINTQYVF-

*LS-mCXCL1<sup>28-96</sup>-G<sub>3</sub>-c-myc-Aga2*

MKVLIVLLAIFAALPLALAQPVIISTTVGSAAEGSLDKR**ANELRCQ**CLQTMAGIHLKNIQSLKVLPSGPHCTQTEVIATLKNGREACLDPAPLVQKIVQKM  
**LKGVPK**GGGEQKLISEEDLQELTTICEQIPSPITLSTPYSLSTTTILANGKAMQGVFEYYKSVTFVSNCGSHPSTTSKGGSPINTQYVF-

*LS-mCXCL2<sup>31-100</sup>-G<sub>3</sub>-c-myc-Aga2*

MKVLIVLLAIFAALPLALAQPVIISTTVGSAAEGSLDKR**ASELRCQCLKTLPRVDFKNIQSLSVTPPGPHCAQTEVIATLKGGQKVCLDPEAPLVQKI IQKI**  
**LNKGGKANGGG**EQKLISEEDLQ****ELTTICEQIPSPBLESTPYSLSTTTILANGKAMQGVFEYYKSVTFVSNCGSHPSTTSKGSPINTQYVF-

*LS-mCXCL3<sup>31-100</sup>-G<sub>3</sub>-c-myc-Aga2*

MKVLIVLLAIFAALPLALAQPVIISTTVGSAAEGSLDKR**ASELRCQCLNLTLPVDFETIQSLTVTPPGPHCTQTEVIATLKDGQEVCLNPQGPRLQII IKKI**  
**LKSGKSSGGG**EQKLISEEDLQ****ELTTICEQIPSPBLESTPYSLSTTTILANGKAMQGVFEYYKSVTFVSNCGSHPSTTSKGSPINTQYVF-

*LS-mCXCL4<sup>30-105</sup>-G<sub>3</sub>-c-myc-Aga2*

MKVLIVLLAIFAALPLALAQPVIISTTVGSAAEGSLDKR**VTSAGPEESDGLSCVCVKTISSGIHLKHITSLEVIKAGRHCAPVQLIATLKNGRKCICLDRQA**  
**PLYKKVIKKILESGGG**EQKLISEEDLQ****ELTTICEQIPSPBLESTPYSLSTTTILANGKAMQGVFEYYKSVTFVSNCGSHPSTTSKGSPINTQYVF-

*LS-mCXCL5<sup>48-118</sup>-G<sub>3</sub>-c-myc-Aga2*

MKVLIVLLAIFAALPLALAQPVIISTTVGSAAEGSLDKR**ATELRCVCLTVTPKINPKLIANLEVI PAGPQCPTVEVI AKLKNQKEVCLDPEAPVIKKI IQKI**  
**LGSDKKKAGGG**EQKLISEEDLQ****ELTTICEQIPSPBLESTPYSLSTTTILANGKAMQGVFEYYKSVTFVSNCGSHPSTTSKGSPINTQYVF-

*LS-mCXCL7<sup>48-113</sup>-G<sub>3</sub>-c-myc-Aga2*

MKVLIVLLAIFAALPLALAQPVIISTTVGSAAEGSLDKR**IELRCRCNTNISGIPFNSISLVNVYRPGVHCADVEVIATLKNGQKTCLDPNAPGVKRIVMKIL**  
**EGYGGG**EQKLISEEDLQ****ELTTICEQIPSPBLESTPYSLSTTTILANGKAMQGVFEYYKSVTFVSNCGSHPSTTSKGSPINTQYVF-

*LS-mCXCL9<sup>22-126</sup>-G<sub>3</sub>-c-myc-Aga2*

MKVLIVLLAIFAALPLALAQPVIISTTVGSAAEGSLDKR**TLVIRNARCSCI STSRGTIHYKSLKDLKQFAPSPNCNKTEI IATLKNGDQTCCLDPDSANVKKL**  
**MKEWEKKISQKKKQKRGKKHQKNMKNRKPPTQPSRRRSRKTGGG**EQKLISEEDLQ****ELTTICEQIPSPBLESTPYSLSTTTILANGKAMQGVFEYYKSVTF  
VSNCGSHPSTTSKGSPINTQYVF-

*LS-mCXCL10<sup>22-98</sup>-G<sub>3</sub>-c-myc-Aga2*

MKVLIVLLAIFAALPLALAQPVIISTTVGSAAEGSLDKR**IPLARTVRCNCIHIDDGPVRMRAIGKLEIIPASLSCPRVEI IATMKKNDEQRCLNPESKTIKN**  
**LMKAFSQKRSKRAPGGG**EQKLISEEDLQ****ELTTICEQIPSPBLESTPYSLSTTTILANGKAMQGVFEYYKSVTFVSNCGSHPSTTSKGSPINTQYVF-

*LS-mCXCL11<sup>22-100</sup>-G<sub>3</sub>-c-myc-Aga2*

MKVLIVLLAIFAALPLALAQPVI STTVGSAAEGSLDKR **FLMFKQGRCLCIGPGMKAVKMAEIEKASVIYPSNGCDKVEVIVTMKAHKRQRCLDPRSKQARL**  
**IMQAIEKKNFLRRQNMGGGEQKLISEEDLQ**ELTTICEQIPSTLESTPYSLSSTTTILANGKAMQGVFEYYKSVTFVSNCGSHPSTTSKGSPINTQYVF-
